# Supplementary material for: Vibrational Energy Transfer in CO+N2 Collisions: A Database for V–V and V–T/R Quantum-Classical Rate Coefficients
Source: MDPI journal article supplement (doi:10.3390/molecules26237152), 2021-11-25
Supplement: s1 [file s1]

# Supplementary Materials: Vibrational Energy Transfer in CO+N<sub>2</sub> Collisions: a Database for V-V and V-T/R Quantum-Classical Rate Coefficients

Qizhen Hong<sup>1,2</sup>, Massimiliano Bartolomei<sup>3</sup>, Cecilia Coletti<sup>4\*</sup>, Andrea Lombardi<sup>5</sup>, Quanhua Sun<sup>1,2</sup> and Fernando Pirani<sup>5</sup>

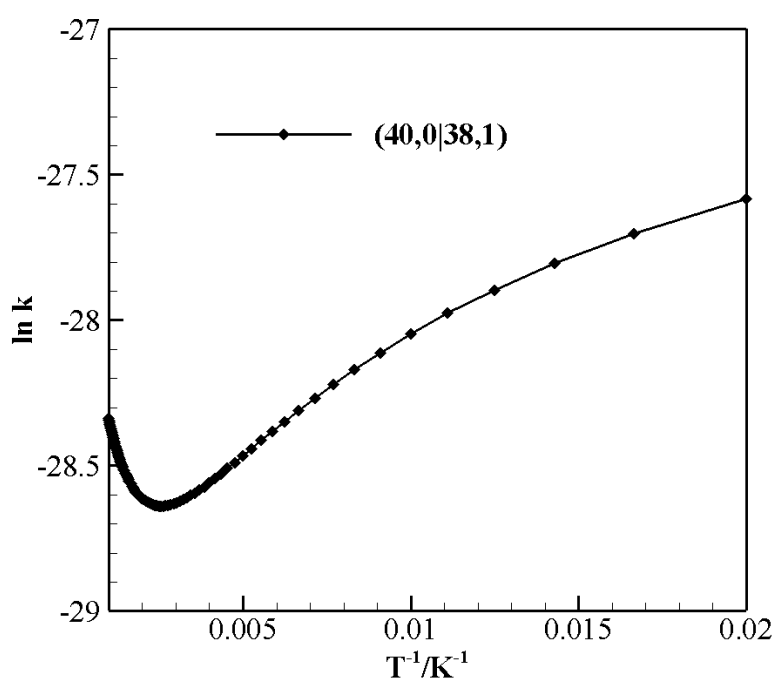

**Figure S1.** Landau-Teller plot of the rate coefficients for the transition (40,0)→(38,1). An anti-Arrhenius behavior is found at low temperature.
